# Supplementary material
Source: publisher site journal article supplement (https://www.dovepress.com/article/517584)
Supplement: Supplementary file 1 [file 517584%20Supplementary%20file.docx]

# **SUPPLEMENTAL MATERIAL**

**A**

**Supplementary Figure 1**: the mapping of each C4bpα construct and of the C4bpβ construct with the single eGFP tracking function are depicted for: **(A)** CoMiX-Fc [Fc/VHH(T) and Fc/VHH(P)], **(B)** CoMiX-FHR4 [FHR4/VHH(T) and FHR4/VHH(P)], **(C)** VHH(T)/Fc Δhinge and **(D)** VHH(T).

**Supplementary Figure 2**: Visualization of the molecular pattern of purified multimeric immunoconjugates. Western blot analysis of complexes separated under non-reducing conditions

**(A, B)** and SYPRO Ruby protein gel staining under reducing conditions **(C,D)**. **(A)** **1.** FHR4/VHH(T) fraction 1, **2.** FHR4/VHH(T) fraction 2/3, **3.** FHR4/VHH(P) fraction 1, **4.** FHR4/VHH(P) fraction 2/3. Under non-reducing conditions, seven bands are visible for the different fractions corresponding to FHR4-valencies varying between 1 and 7. The pooled fractions f2 and f3 display higher FHR4-valencies than their f1 counterpart and were used for further experiments. **(B)** **1.** FHR4/VHH(T) fraction 1, **2.** FHR4/VHH(T) fraction 2/3, **3.** FHR4/VHH(P) fraction 1, **4.** FHR4/VHH(P) fraction 2/3, **5.** VHH(P)/Fc, **6.** VHH(T)/Fc. For CoMiX-Fc, the different molecular species were analyzed and revealed with a goat anti-human IgG antibody that cross-reacts with the VHH region. **(C)** The multimers were analyzed by SYPRO Ruby gel staining under reducing conditions. **1.** FHR4/VHH(T) fraction 1, **2.** FHR4/VHH(T) fraction 2/3, **3.** FHR4/VHH(P) fraction 1, **4.** FHR4/VHH(P) fraction 2/3, **5.** VHH(P)/Fc, **6.** VHH(T)/Fc. Three bands can be observed for FHR4/VHH(T) and FHR4/VHH(P), representing the monomeric forms of the FHR4.C4bpα.His (120 kDa), eGFP.SCR3.C4bpβ (50 kDa) and the VHH(T).C4bpα.FLAG (40 kDa) or VHH(P).C4bpα.FLAG (30 kDa) targeting components. VHH(T)/Fc and VHH(P)/Fc molecules display two bands representing the eGFP.SCR3.C4bpβ and VHH(T).C4bpα.Fc chains and VHH(P).C4bpα.Fc, respectively. **(D)** The control CoMiX were analyzed by SYPRO Ruby gel staining under reducing conditions **1.** VHH(T)/Fc Δhinge, **2.** VHH(T). The VHH(T) control molecule has no FHR4- or Fc-effector functions, only targeting (VHH(T).C4bpα.His) and tracking (eGFP.SCR3.C4bpβ) functions, whereas VHH(T)/Fc Δhinge shows one band for VHH(T).C4bpα.Fc.

**Supplementary Figure 3**: Gating strategy for flow cytometry analysis of C3b, C5b9 depositions and Complement Dependent Cytotoxicity on BT474 cells. Live BT474 single cells were identified by an intersect gating strategy excluding debris (FSC-A/SSC-A), doublets (SSC-A/SSC-H) and dead cells (FSC-A/Live Dead). Histogram plots on live BT474 cells were used to represent C3b and C5b9 MFI. The percentage of dead cells was calculated by dividing the number of L/D-positive cells by the total number of cells analyzed.

**C**

**B**

**A**

**Supplementary Figure 4**: Dose response analysis of C3b/iC3b, C5b9 depositions and complement-dependent cytotoxicity (CDC) on BT474 tumor cells. **(A)** C3b/iC3b deposition was detected with mouse anti-human C3b mAb and a secondary goat anti-mouse IgG Ab conjugated with AF647. CoMiX-Fc and CoMiX-FHR4 molecules elicit stronger complement activating effects than trastuzumab, pertuzumab and the combination of these two antibodies. Combining CoMiX-Fc and CoMiX-FHR4 molecules with other multimers resulted in the highest level of C3b desposition. **(B)** Staining with anti-C5b9 mAb followed by PE-conjugated anti-mouse IgG pAb was used to detect membrane attack complex (MAC) formation. **(C)** CDC on BT474 tumor cells incubated with 3-fold serial dilutions: from 15 µg to 0.5 µg/well in case of individual molecules, and from 7.5 µg to 0.25 µg/well of each in case of molecule combinations. As controls, therapeutic antibodies and NHS were used. The percentage of dead cells was calculated by dividing the number of live/dead-positive (dead) cells with the total number of analysed cells. Data are presented as mean values ±SD of n = 3 independent experiments.

**Supplementary Figure 5.** Representative effects ofthe GVB++ or the GVB+ bufferon C3b deposition and Complement Dependent Cytotoxicity(CDC), and NK cell activation stimulated by trastuzumab and VHH(P)/Fc. **A.** Representative MFI plots of C3b deposition induced by the combination of CoMiX-FHR4 or the combination of VHH(T)/Fc and FHR4/VHH(P)/Fc or the combination of trastuzumab and pertuzumab. **B.** Representative flow cytometry dot plotsof CDCinduced by the combination of CoMiX-FHR4 or the combination of VHH(T)/Fc and FHR4/VHH(P)/Fc or the combination of trastuzumab and pertuzumab.  **C.** Flow cytometry dot plots representing the gating strategy and the expression of CD107a and IFN-y on live CD3- NK92humCD16 cells in the left panel.Live NK92humCD16 cells were identified using an intersect gating strategy excluding debris (FSC-A/SSC-A), BT474 cells (FSC-A/CD16) and dead cells (FSC-A/Live Dead (data not shown). Representative dot plots on Live NK92humCD16 cells are depicted in the right panel to show the percentages of CD107a or IFN-y expression on CD3- NK92humCD16 cells in presence of trastuzumab and VHH(P)/Fc.

**Supplementary Figure 6.** Measurement of anti-HER2 antibodies in sera of mice at sacrifice when the xenograft of BT474 cells sensitive to trastuzumab was collected.Concentration of total anti-HER2 IgG in sera was determined by ELISA at days 15 after the last administration of the therapeutic molecules. Data are represented as the mean values ± SEM. The results correspond to 4 independent experiments (n = 2-3 mice per group).

##### **Supplemental material and methods**

**Plasmid design**

The pEF-IRESpac bicistronic expression vector16 was used to clone all expression cassettes into the multiple cloning site between EcoRI and XbaI to generate stable mammalian cell lines that express high levels of recombinant proteins and contains the puromycin resistant gene for selection of stably transfected cells. The expression cassettes were cloned as previously described13. Briefly, the signal peptide derived from the tumor necrosis factor receptor superfamily member 16 (UniProt no. P08138) was cloned between EcoRI and BglII, followed by the cDNA encoding the 2D3 VHH anti-HER2 (trastuzumab‐competing epitope), 47D5 VHH anti-HER2 (pertuzumab‐competing epitope), the FHR4A protein (UniProt no. Q92496) or eGFP, inserted between BglII and BspEI. The cDNA encoding (i) a 5x (SG4S) linker, followed by (ii) the C4bp C-terminal -chain oligomerization domain and (iii) the Fc fragment from human IgG1 (hinge, CH2 & CH3), was cloned between BspEI and NotI. Plasmids containing the 2D3-VHH anti-HER2 (trastuzumab‐competing epitope) and 47D5 (WO2009068625A2) VHH anti-HER2 (pertuzumab‐competing epitope) adapted from patent WO2009068625A2, were synthesized by ProteoGenix SAS (Schiltigheim, France).

##### **Cell culture and antibodies**

All CoMiX were produced in HEK293T cells (American Type Culture Collection, ATCC CRL-3216) cultured in Dulbecco’s modified Eagle’s medium (Gibco, Thermo Fisher Scientific) supplemented with 10% (v/v) heat-inactivated Fetal Bovine Serum (Gibco), 1 U/mL of penicillin (Westburg, Leusden, The Netherlands), 1 μg/mL of streptomycin (Westburg), and 4 mM of glutamine (Westburg). For protein production, Opti-MEM reduced serum media (Gibco) was used. Trastuzumab-sensitive BT474 (ATCC HTB-20), trastuzumab-resistant BT474 clone 5 (ATCC CRL-3247) cell lines were purchased from ATCC and NK92humCD16 provided by Pr Clemenceau, University of Nantes, France15 cells. Albumin Fraction V (BSA) was purchased from Roth (Keerbergen, Belgium). Goat anti-human IgG Fc pAb (#ab97221), goat anti-human IgG Fc HRP pAb (#ab97225), goat anti-rabbit IgG Fc AF568 pAb, and mouse anti-human C5b9 mAb (#ab66768, clone aE11) were purchased from Abcam (Cambridge, UK). Rabbit anti-His pAb was purchased from Bethyl (#A190214A, ImTec Diagnostic NV, Antwerpen, Belgium). Goat anti-mouse IgG AF647, the near IR Live/Dead staining, and DAPI were obtained from Invitrogen (Thermo Fisher Scientific BVBA, Merelbeke, Belgium). Mouse anti-human C3/C3b/iC3b mAb was provided by Cedarlane (#CL7637AP, Sanbio B.V., Uden, The Netherlands). Goat anti-human IgG AF647 was purchased from Southern Biotech (#2048-31, Birmingham, United States). GolgiStop and GolgiPlug were purchased from BD Biosciences (Eysins, Switzerland). The Brilliant Violet 421 anti-human CD107a and goat anti-mouse IgG AF488 antibodies were purchased from Biolegend (Amsterdam, The Netherlands). Rabbit anti-human C3d polyclonal antibody was provided by Agilent (DAKO, #A0063, Amstelveen, The Netherlands). Mouse anti-human FHR4 AF488 mAb was purchased from R&D Systems Europe Ltd, (#IC5980G-100UG, clone 640212, Bio-Techne, Abingdon, UK). Goat anti-mouse IgG APC was obtained from Jackson ImmunoResearch (Sanbio). Commercial trastuzumab (Herceptin) and pertuzumab (Perjeta) antibodies were purchased from Roche (Prophac, Howald, Luxembourg).

##### **Protein production and purification**

CoMiX-Fc molecules were purified using Protein G Sepharose® 4 Fast Flow beads (GE Healthcare). Filtered supernatants were incubated with Protein G beads roller-bottled for 2 days at 4°C. Beads were collected by centrifugation and washed 2 times with 50 ml PBS. CoMiX-Fc were eluted using phosphate citrate buffer at a low pH (pH 2.7). The eluate was immediately neutralized with buffer (bi-carbonate buffer, pH 9.1) at a 4:1 ratio to a final pH 7.2-7.4. Protein solutions were next concentrated using Amicon© 30 kDa MWCO centrifugal filters (Millipore-Merck Chemicals NV/SA). The protein concentration was then measured at 280 nm on a NanoDrop™ micro-volume spectrophotometer.

CoMiX-FHR4 molecules and VHH controls were purified using Nickel His-Trap™ Excel columns (Cytiva). Filtered Opti-MEM supernatants were supplemented with imidazole (Sigma-Aldrich) to a 20 mM final concentration to avoid nonspecific binding. The molecules were then loaded to the His-Trap column for 3 days using a peristaltic pump with a flow rate of 1-2 ml/min. (GE-Healthcare, VWR). The His-Trap column was connected to a NGC Chromatography purification system (Bio-Rad) and washed with 20 mM phosphate buffer with 500 mM NaCl at pH 7.2 supplemented with imidazole for elution. Three elution fractions (f1-f3) were collected after purification and analyzed to maximize the FHR4-valency as high valencies are a prerequisite to overcome complement inhibition threshold13. Fraction 1 (f1) was collected under 120 mM imidazole concentration, whereas for f2 and f3 1 M imidazole concentration was used. As the molecular pattern of f2 and f3 was identical (supplementary figure 1A), the two fractions were pooled and used for further experiments. The elution fraction was concentrated on Amicon© 30 kDa MWCO centrifugal filters and dialyzed in 3x5L of PBS using 10 kDa MWCO Slide-A-lyzer® dialysis cassettes (Thermo Fisher Scientific) to remove any residual imidazole. Protein concentration was measured on Nanodrop (Ozyme, Saint-Cyr-l'École, France).

##### **SYPRO Ruby protein gel staining and western blotting**

To visualize the molecular pattern of CoMiX molecules, we used SDS/PAGE followed by either Western blotting or SYPRO Ruby gel staining. One µg of purified CoMiX molecules were mixed with 4 µl of 4X Laemmli sample buffer (Bio-Rad), supplemented with 10% 2-mercaptoethanol (Sigma-Aldrich) for reducing conditions. The samples were loaded onto 4-15% Mini-Protean® TGX™ protein acrylamide gels (Bio-Rad) and electrophoresed. After fixation (methanol/acetic acid), the gel was stained using SYPRO Ruby staining solution according to the manufacturer’s instructions. The gel was then revealed by the Amersham™ Typhoon™ biomolecular imager with appropriate filter. For western blot analysis, the proteins were electroblotted from gels onto methanol-activated Amersham Hybond 0.2 μm low-fluorescence background PVDF membranes (GE Healthcare) using a Mini Trans-Blot® electrophoretic transfer cell system (Bio-Rad). The membrane was blocked with 5% (w/v) low-fat milk in PBS overnight at 4°C shaking. The next day, 1 µg of the following antibodies were added: mouse anti-human FHR4 AF488-conjugated monoclonal Ab (mAb) (R&D Systems) for CoMiX-FHR4 molecules and goat anti-human IgG polyclonal antibody (pAb) AF647-conjugated (Abcam) for CoMiX-Fc molecules. After 3 washes with 0.05% TBS-Tween buffer, the membranes were dried and analysed using the Amersham™ Typhoon™ laser-scanner platform.

**Immunohistochemistry of xenografts**

Xenograft samples of BT474 cells sensitive to trastuzumab were embedded in paraffin, sectioned at 4μm and processed for immunohistochemistry by HistoWiz, Inc. using the Leica Bond RX automated stainer (Leica Microsystems), following a Standard Operating Procedure and fully automated workflow. Slides were dewaxed using xylene and alcohol-based dewaxing solutions. For CD45 staining, heat-induced epitope retrieval (HIER) was performed using a citrate-based pH 6 solution (Leica Microsystems, AR9961) for 20 minutes at 100°C. Tissues were incubated with a peroxide block buffer (Leica Microsystems), followed by rabbit anti-CD45 (Abcam ab10558, 1:2,000 dilution) for 30 minutes. The detection was performed using rabbit polymer secondary antibody reagents, DAB, and hematoxylin (Bond Polymer Refine Detection Kit, Leica Microsystems). For CD335 staining (NKp46), HIER was performed using an EDTA-based pH 9 solution (Leica Microsystems, AR9640) for 30 minutes at 100°C. Tissues were incubated with a peroxide block buffer (Leica Microsystems), followed by goat anti-CD335 (R&D Systems AF2225, 1:100 dilution) for 30 minutes and HRP-donkey anti-goat IgG H&L (Abcam ab205723, 1:1000 dilution in PBS). DAB and hematoxylin were used for detection. All slides were dehydrated in an alcohol series, coverslipped (Sakura), and visualized using AT2 scanners (Leica Microsystems) at 40X magnification. To analyse complement activation in the model of BT474 tumors cells sensitive to trastuzumab, tumors were sectioned to a thickness of 5 µm using the rotary microtome cryostat machine (Leica) and were fixed with 75% acetone + 25% water cooled at -20°C and dried at room temperature. The sections were blocked with 5% BSA-PBS solution at room temperature for 1 hour and washed 3 times with 1% BSA-PBS. CoMiX-FHR4 and VHH control sections were incubated with 1 µg of rabbit anti-His mAb (Bethyl) or rabbit anti-human C3d polyclonal Ab (Agilent) primary antibodies (that cross-reacts with mouse complement), followed by the goat Anti-Rabbit IgG Fc AF568 (Abcam) secondary antibody. CoMiX-Fc were revealed with goat anti-human IgG AF647-conjugated antibody (Abcam). The sections were fixed with 1% PFA and stained with 200-fold diluted DAPI (Invitrogen). The slides were read on the CSU-W1 Spinning Disk/High Speed Widefield confocal microscope lens X40. Twenty five (5x5) planes were pictured for each tumor section and the results were reconstructed using the NIS Elements Nikon software.

**Measurement of anti-HER2 antibodies**

When the xenograft samples of BT474 cells sensitive to trastuzumab were collected at sacrifice, the sera of mice was sampled. Anti-HER2-specific IgG were measured by sandwich ELISA. Briefly, Maxisorp 96-well plates (Thermofisher Scientific) were coated overnight with 0.5 µg/mL of recombinant human HER-2 (Abcam). Plates were washed, blocked with 1% BSA-PBS, and sera were incubated for 2 hours. HRP-conjugated goat anti-mouse IgG (Thermofisher Scientific) was added for 2 hours. After washings, reaction was developed with tetramethylbenzidine as a substrate, stop with H2SO4, and the absorbance was measured at 450nm using a spectrophotometer (Molecular Devices, USA). The titer was calculated by binary logarithm regression as the reciprocal dilution of the sample, where the extinction was 2-fold the background extinction.
